# Supplementary material for: Organo-Functionalization: An Effective Method in Enhancing the Separation and Antifouling Performance of Thin-Film Nanocomposite Membranes by Improving the Uniform Dispersion of Palygorskite Nanoparticles
Source: MDPI journal article supplement (doi:10.3390/membranes11110889), 2021-11-19
Supplement: s1 [file s1]

# Organo-Functionalization: An Effective Method in Enhancing the Separation and Antifouling Performance of Thin-Film Nanocomposite Membranes by Improving the Uniform Dispersion of Palygorskite Nanoparticles

Liu Yang <sup>1</sup>, Qianwen Zhang <sup>2</sup>, Qikun Wang <sup>1</sup>, Wande Ding<sup>1,3,\*</sup>, Kefeng Zhang <sup>1</sup>

<sup>1</sup> School of Municipal and Environmental Engineering, Shandong Jianzhu University, Jinan 250101, China; 15665888192@163.com (L.Y.); qikunwang12@gmail.com (Q.W.); kfz@sdjzu.edu.cn (K.Z.)

<sup>2</sup> School of Water Resources & Environment, China University of Geosciences, Beijing 100083, China; zhangqw@caep.org.cn

<sup>3</sup> Shandong Shuifa Environmental Technology Co., Ltd., Jining 272000, China

\* Correspondence: dingwande18@sdjzu.edu.cn

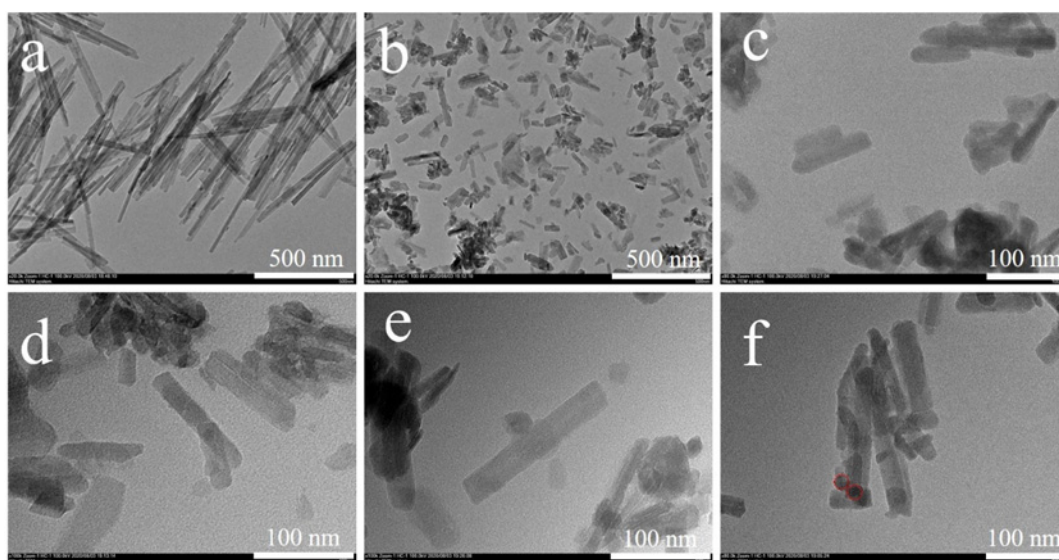

Figure S1. TEM images of different Pal nanoparticles. (a) Pal, (b) g-Pal, (c) K-Pal<sub>0.25</sub>, (d) K-Pal<sub>0.75</sub>, (e) K-Pal<sub>1.5</sub> and (f) K-Pal<sub>3.0</sub>.

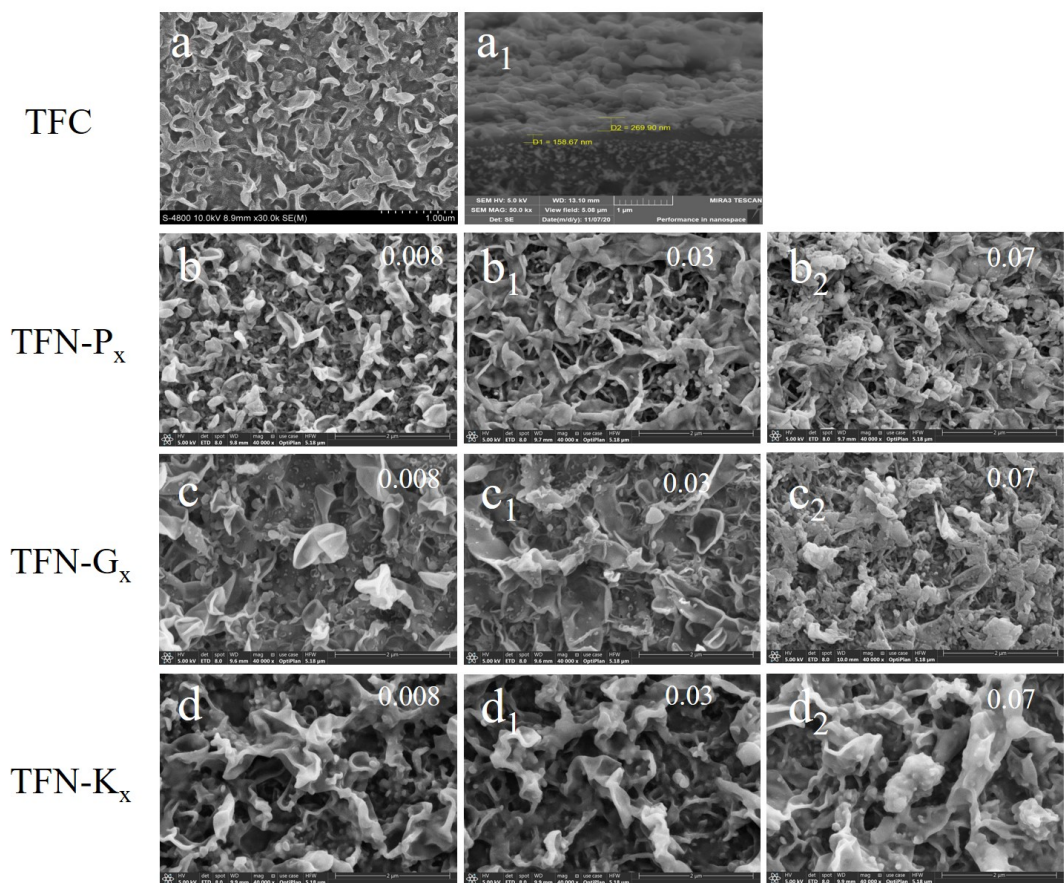

Figure S2. SEM images of TFC (a, a<sub>1</sub>), TFN-P<sub>x</sub> (b-b<sub>2</sub>), TFN-G<sub>x</sub> (c-c<sub>2</sub>) and TFN-K<sub>x</sub> (d-d<sub>2</sub>) membranes.

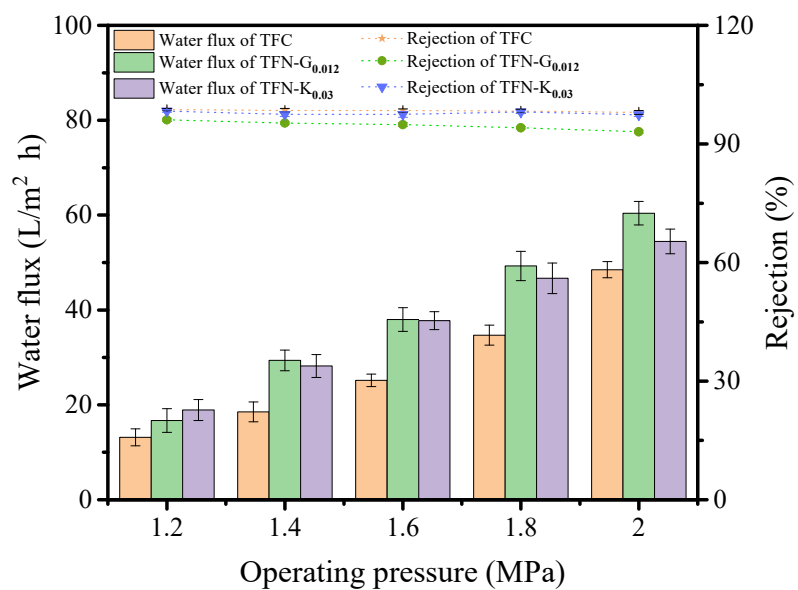

Figure S3. Water flux and NaCl rejection of TFC, TFN-G<sub>0.012</sub> and TFN-K<sub>0.03</sub> membranes under different operation pressure.
